# Supplementary material
Source: Springer Nature journal article supplement (https://www.springermedizin.de/resource/supplementary/13051_2009_27_MOESM2_ESM.pdf/9669788)

# Log2 Ratio

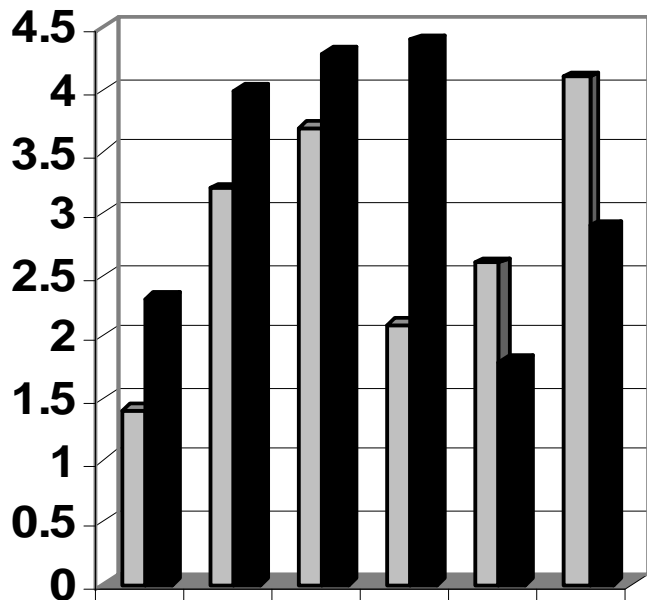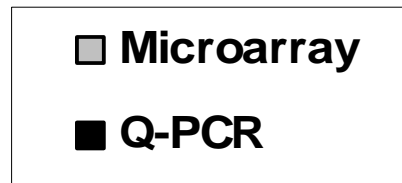

Supplement: MOESM2 [file 9669788]
